# Supplementary material for: Small RNA Profiling of Influenza A Virus-Infected Cells Identifies miR-449b as a Regulator of Histone Deacetylase 1 and Interferon Beta
Source: PLoS One. 2013 Sep 26;8(9):e76560. doi: 10.1371/journal.pone.0076560 (PMC3784411; doi:10.1371/journal.pone.0076560)
Supplement: Table S4 — Gene ontology analysis of miRNA regulated genes during influenza virus infection. (XLS) [file pone.0076560.s004.xls]

## Sheet: Sheet1
Table S4. Gene ontology analysis of miRNA regulated genes [a]
GO term [b]	Genes represented by GO term [c]	p-Value [d]	Gene [e]
mitotic cell cycle	17	2.93846e-07	BIRC5, CDC20, CDC25B, CDK4, CDKN1A, MCM3, MCM7, PSMD8, PSME3, RCC2, RFC5, TUBA1A, TUBA4A, TUBB, TUBB4B, UBE2C, ZWILCH
cytosol	40	2.84106e-05	AP1M1, AP1S2, ARHGAP1, BIRC5, CAP1, CASP2, CAV1, CDC20, CDC25B, CDK4, CDKN1A, COPZ1, EVL, EZR, GYG1, HDAC1, HMBS, LDHA, LSM2, MAP2K1, ODC1, PNPO, PPARG, PPCS, PPP1CA, PRDX6, PSMD8, PSME3, RCC2, RPS9, SRM, STK24, TK1, TUBA1A, TUBA4A, TUBB, TUBB4B, UBE2C, UROS, ZWILCH,
cell division	12	0.00040801	BIRC5, CDC20, CDC25B, CDK4, PPP1CA, RCC2, TUBA1A, TUBA1C, TUBB, UBE2C, UBE2I, ZWILCH,
nucleoplasm	22	0.000766039	CDC20, CDC25B, CDK4, CDKN1A, FHL2, GTF2E2, HDAC1, HNRNPUL1, LSM2, MCM3, MCM7, PPARG, PPP1CA, PSMD8, PSME3, RFC5, SF3A3, SRSF6, SSRP1, STK24, TOP2A, UBE2C,
protein polymerization	5	0.00178506	TUBA1A, TUBA1C, TUBA4A, TUBB, TUBB4B,
cell cycle checkpoint	8	0.00182518	CDC20, CDKN1A, MCM3, MCM7, PSMD8, PSME3, RFC5, UBE2C,
enzyme binding	9	0.00357631	BIRC5, CASP2, CDC20, HDAC1, HNRNPUL1, PPARG, RFC5, TOP2A, UBE2I,
G2/M transition of mitotic cell cycle	7	0.00391133	BIRC5, CDC25B, CDKN1A, TUBA1A, TUBA4A, TUBB, TUBB4B,
S phase of mitotic cell cycle	7	0.00430025	CDK4, CDKN1A, MCM3, MCM7, PSMD8, PSME3, RFC5,
actin cytoskeleton	8	0.00468359	ARPC1A, ARPC1B, ARPC5, CORO1C, EZR, FHL2, PDLIM7, PODXL,
cytoskeleton	18	0.00480569	ARPC1A, ARPC1B, ARPC5, BIRC5, CDC20, CDC25B, EVL, EZR, HSBP1, RCC2, STK39, TPGS2, TUBA1A, TUBA1C, TUBA4A, TUBB, TUBB4B, ZYX,
uroporphyrinogen-III synthase activity	2	0.00502597	HMBS, UROS,
cytoplasmic microtubule	4	0.00540731	BIRC5, TUBA1A, TUBA1C, TUBA4A,
protein folding	8	0.00572024	LMAN2L, MLEC, PPIL3, TUBA1A, TUBA1C, TUBA4A, TUBB4B, URI1,
cytoskeleton-dependent intracellular transport	3	0.00609584	TUBA1A, TUBA1C, TUBB,
regulation of actin filament polymerization	3	0.00872878	ARPC1A, ARPC1B, ARPC5,
DNA replication	7	0.0087442	MCM3, MCM7, NAP1L1, RFC5, SSRP1, TK1, TOP2A,
cytoplasm	60	0.00877994	API5, ARHGAP1, ARPC1A, ARPC1B, ARPC5, BABAM1, BIRC5, CAP1, CASP2, CAV1, CDC20, CDC25B, CDK4, CDKN1A, CDKN3, COPZ1, DERA, EVL, EZR, FHL2, GNPDA1, HDAC1, HMBS, HMGN2, HNRNPAB, LDHA, LYPLAL1, MAP2K1, MCM3, METAP1, MOB4, PDLIM7, PEA15, PODXL, PPP1CA, PRDX6, PSMD8, PSME3, RAB8A, RCC2, RPS9, SSRP1, STK24, STK39, STRAP, TAX1BP3, TFG, TGM2, TK1, TMEM109, TOP2A, TPGS2, TUBA1A, TUBA1C, TUBA4A, TUBB, TUBB4B…
G1/S transition of mitotic cell cycle	7	0.00899121	CDK4, CDKN1A, CDKN3, MCM3, MCM7, PSMD8, PSME3,
cellular response to amine stimulus	2	0.00916899	HMBS, UROS,
focal adhesion	6	0.0107509	CAV1, EVL, EZR, FHL2, PDLIM7, ZYX,
de novo' posttranslational protein folding	4	0.0121737	TUBA1A, TUBA1C, TUBA4A, TUBB4B,
GTPase activity	9	0.0131679	ERAL1, GNB1, RAB8A, RRAS, TUBA1A, TUBA1C, TUBA4A, TUBB, TUBB4B,
cellular response to arsenic-containing substance	2	0.0136859	HMBS, UROS,
positive regulation of exit from mitosis	2	0.0136859	BIRC5, UBE2C,
heme biosynthetic process	3	0.0139129	HMBS, SLC25A39, UROS,
protein complex	9	0.0145164	CAV1, CDC20, TOP2A, TRMT112, TUBA1A, TUBA1C, TUBA4A, TUBB, TUBB4B,
mitosis	7	0.0178514	BIRC5, CDC25B, MAP2K1, PBK, TUBB, UBE2C, UBE2I,
GTP catabolic process	8	0.0182238	GNB1, RAB8A, RRAS, TUBA1A, TUBA1C, TUBA4A, TUBB, TUBB4B,
activation of anaphase-promoting complex activity	2	0.0187845	CDC20, UBE2C,
tetrapyrrole biosynthetic process	2	0.0187845	HMBS, UROS,
M phase of mitotic cell cycle	5	0.0207815	BIRC5, CDC20, CDC25B, RCC2, ZWILCH,
cellular response to extracellular stimulus	3	0.0222782	AXL, CDKN1A, LDHA,
microtubule	8	0.0266983	MAP2K1, RCC2, TPGS2, TUBA1A, TUBA1C, TUBA4A, TUBB, TUBB4B,
microtubule-based movement	5	0.0288617	TUBA1A, TUBA1C, TUBA4A, TUBB, TUBB4B,
cellular component movement	5	0.0293167	ARPC1B, ARPC5, MAP2K1, TUBB, TUBB4B,
Arp2/3 protein complex	2	0.0306157	ARPC1B, ARPC5,
microtubule-based process	3	0.0339864	TUBA1A, TUBA1C, TUBB,
chlorophyll biosynthetic process	2	0.035785	MCM3, MCM7,
magnesium chelatase activity	2	0.035785	MCM3, MCM7,
photosynthesis	2	0.035785	MCM3, MCM7,
DNA strand elongation involved in DNA replication	3	0.0365941	MCM3, MCM7, RFC5,
MCM complex	2	0.0437029	MCM3, MCM7,
cyclin-dependent protein kinase holoenzyme complex	2	0.0437029	CDK4, CDKN1A,
a. Genes that decreased in expression due to miRNA expression during infection were characterized by gene ontology.
b. Gene ontology term associated with genes identified by InnateDB [40-41].
c. Number of genese represented by given GO term.
d. p-Value associated with gene enrichment of GO term
e. Genes identified to be associated with given GO term.
